# Supplementary material
Source: PubMed Central journal article supplement (PMC5824286)
Supplement: jamaoncol-3-1222-s001.pdf [file jamaoncol-3-1222-s001.pdf]

1 **Original Version dated 17 May 2013**

2 **Low Dose Chemotherapy Versus Best Supportive Care in Progressive Pediatric Malignancies:**  
3 **Double Blind Placebo Controlled Randomized Study**

4 Information provided by (Principal Investigator):

5 Sameer Bakhshi, All India Institute of Medical Sciences, New Delhi

6 **ClinicalTrials.gov Identifier:NCT01858571**

7

8 **Purpose of the Study:**

9 Many of the paediatric malignancies are not curable on progression on front line or 2nd line  
10 chemotherapy. Further therapy with conventional drugs imposes many side effects and decreases  
11 the QOL. The usual therapy offered to such patients is best supportive care. Metronomic  
12 chemotherapy can induce tumor stabilization or tumor responses in patients with cancer that are  
13 refractory or have relapsed after conventional chemotherapy. Whether metronomic therapy is  
14 better than best supportive care is not known. In order to do so, a study is required which may  
15 compare metronomic therapy with a placebo therapy on PFS and QOL in relapsed refractory cases of  
16 paediatric solid tumours who have failed at least two lines of chemotherapy.

17

18 **HYPOTHESIS**

19 The investigators hypothesize that metronomic chemotherapy in progressive paediatric malignancy  
20 will improve PFS and QOL. If validated, then this form for therapy will be an option for both the  
21 patients and the clinicians, who are left with just an option of best supportive care in such situations  
22 of progressive paediatric cancers despite multiple lines of chemotherapy.

23

24 **Condition: Malignant Childhood Neoplasm.**

25 **Intervention: Drug: Low dose chemotherapy.**

26 **Phase: Phase 3**

27 **Study Type: Interventional**

28 **Study Design: Allocation: Randomized**

29 **Endpoint Classification: Safety/Efficacy Study**

30 **Intervention Model: Parallel Assignment**

31 **Masking: Double Blind (Subject, Caregiver)**

32 **Primary Purpose: Treatment**

33

34 **Primary Outcome Measures:** •Progression free survival

35 **Secondary Outcome Measures:** •Overall Survival

36 **Other Outcome Measures:** •Quality of life

37 •Bio marker of angiogenesis (VEGF), Thrombospondin-1

38 **Eligibility:**

39 Ages Eligible for Study: 5 Years to 18 Years

40 Genders Eligible for Study: Both

41 **Inclusion Criteria:**

42 1.Refractory/Progressive non hematopoietic extracranial solid tumours following treatment with at  
43 least 2 lines of chemotherapy.

44 2.Good performance status(at least ambulatory)

45 3.Age: 5-18 years

46 4.Recovered from all acute toxic effects of earlier therapy

47 5.Absolute neutrophil count >  $1 \times 10^9/L$

48 6.Absolute platelet count >  $75 \times 10^9/L$

49 7.Normal renal functions

50 8.Serum bilirubin <1.5 times the upper limit of normal, and the serum aspartate aminotransferase  
51 and alanine aminotransferase < 5 times the upper limit of normal.

52 **Exclusion Criteria:**

53 1.Uncontrolled concurrent illness or active infection

54 2.Positive serology for human immunodeficiency.

55 3.Unable to swallow oral medication

56 4.Pregnant and breast-feeding

57

58 **Arms**

59 **1. ARM 1: Experimental: Low dose chemotherapy**

60 Alternating cycles of Cycle A and B (Each cycle includes 3 weeks of drug administration) with each  
61 drug rounded off to the nearest tablet/capsule size.

62 **Cycle A**

63 •Daily oral Thalidomide (at 3mg/kg)

64 •Daily oral Celecoxib (100 mg BID for patients < 20 kg, 200 mg BID for patients 20-50 kg, and 400 mg  
65 BID for patients > 50 kg)

66 •Daily oral Etoposide (50 mg/m<sup>2</sup>/d)

67 **Cycle B**

- 68 •Daily oral Thalidomide (at 3mg/kg)
- 69 •Daily oral Celecoxib (100 mg BID for patients < 20 kg, 200 mg BID for patients 20-50 kg, and 400 mg
- 70 BID for patients > 50 kg)
- 71 •Daily oral Cyclophosphamide (2.5 mg/kg/d to a maximum of 100 mg/d) every 21 days
- 72 Drug: Low dose chemotherapy

| Drug Code | Drugs                                                                                                | Cycle A<br>(3 weeks) | Cycle B<br>(3 weeks) |
|-----------|------------------------------------------------------------------------------------------------------|----------------------|----------------------|
| Cap1      | Thalidomide (3mg/kg)                                                                                 | Daily                | Daily                |
| Cap2      | Celecoxib<br>100 mg BD for pts < 20 kg, 200<br>mg BD for pts 20–50 kg, 400 mg<br>BD for pts > 50 kg, | Daily                | Daily                |
| Cap3      | Etoposide (50mg/m <sup>2</sup> )                                                                     | Daily                | ----                 |
| Tab4      | Cyclophosphamide<br>(2.5mg/kg)(max=100mg)                                                            | ----                 | Daily                |

73

74 **Table 1: Drug schedule used in the study.**

75

76

77 **2. ARM2: Placebo Comparator and Best supportive care**

78 **Placebo:** Alternating cycles of Cycle A and B (Each cycle includes 3 weeks of drug administration)

- 79 •Capsules of same size and colour as used in metronomic therapy

80 **Best supportive care**

- 81 •Management of pain as per WHO standard for pain management

82 **Baseline Assessment**

83

84 1. Basic Blood investigations:

- 85 • Complete Blood Counts.
- 86 • Liver and Kidney Function tests

87 2. Radiological Investigations:

- 88 • Contrast enhanced scan of chest and involved site.

89 3. Assessment of biomarkers of angiogenesis

- 90 • Serum/ plasma sample to measure VEGF, bFGF, endostatin, and thrombospondin-1 levels.

91 4. Assessment of QOL by PedsQL- Cancer Module (version 3)

92

93 **Before Each Cycle**

94 1. Basic Blood investigations:

- 95 • Complete Blood Counts.
- 96 • Liver and Kidney Function tests

97 **Interim (Post 3 cycles: at 9 weeks) and (Post 6 cycles: at 18 weeks)**

98

99 1. Basic Blood investigations:

- 100 • Complete Blood Counts.
- 101 • Liver and Kidney Function tests

102 2. Radiological Investigations:

- 103 • Contrast enhanced scan of chest and involved site.

104 3. Assessment of biomarkers of angiogenesis

- 105 • Serum/ plasma sample to measure VEGF, thrombospondin-1 levels.

106 1. Assessment of QOL by PedsQL- Cancer Module (version 3)

107

108 Further Assessments: Every 3 monthly till Progression

109 1. Basic Blood investigations:

- 110 • Complete Blood Counts.
- 111 • Liver and Kidney Function tests

112 2. Radiological Investigations:

- 113 • Contrast enhanced scan of chest and involved site.

114 3. Assessment of QOL by PedsQL- Cancer Module (version 3)

115 **Assessment at Time of Progression**

116 Assessment of biomarkers of angiogenesis

- 117 • Serum/ plasma sample to measure VEGF and thrombospondin-1 levels.

118

119

120

121

122

123 **Statistical analysis:**

124 Descriptive statistics such as mean, median, standard deviation and range will be used to describe  
125 baseline demographic and clinical profile of all patients. To see association between two categorical  
126 variables, Chi-square test will be used. To see association between two continuous variables, t-test  
127 or Wilcoxon rank sum test will be used. Survivals will be depicted using Kaplan Meier plots.  
128 Difference between groups will be analysed using log-rank test. Proportional survival at specific  
129 times will be determined using Kaplan Meier survival analysis. P-value <0.05 will be considered as  
130 significant. Data analyses will be performed using statistical software packages Stata 11.2.

131 **Sample Size Calculation:**

132 From an exhaustive review of literature, data on PFS in solid extracranial tumours paediatric  
133 tumours after failing two lines of treatment, without any further therapy is not available from  
134 anywhere. From our experience we know that most of such advanced patients will progress within  
135 few weeks to months time. Therefore, we make the modest assumption that 95% of such patients  
136 will progress by 6 months without therapy and a 20% improvement is a standard parameter for  
137 efficacy in oncology patients. With a 2 sided  $\alpha$  of 5% and power of 80%, a sample size of 49 in each  
138 group would detect a 20% difference between the proportion of progression at 6 months between  
139 placebo arm (group 1) and metronomic (group 2) (95% vs 75%). Assuming loss to follow up of 15%,  
140 54 subjects per group will be required. So, total of 108 patients are proposed to be randomized.

141

142 **Ethics and Registration:**

143 The study protocol was submitted to the Institute Ethics Committee and approval has been  
144 obtained. All patients were included in the study after informed written consent.

145

146 **Enrollment: 108**

147 **Study Start Date: October 2013**

148 First received: May 17, 2013

149 Last updated: July 12, 2016

150 Last verified: July 2016

151

152

153

154

155

156

157

158

159

160 **Study Protocol Version 2: (dated 17 June 2014)**

161 **Changes highlighted in yellow.**

162

163 **Low Dose Chemotherapy Versus Best Supportive Care in Progressive Pediatric Malignancies:**

164 **Double Blind Placebo Controlled Randomized Study**

165 Information provided by (Principal Investigator):

166 Sameer Bakhshi, All India Institute of Medical Sciences, New Delhi

167 **ClinicalTrials.gov Identifier:NCT01858571**

168 First received: May 17, 2013

169 Last updated: July 12, 2016

170 Last verified: July 2016

171

172 **Purpose of the Study:**

173 Many of the paediatric malignancies are not curable on progression on front line or 2nd line  
174 chemotherapy. Further therapy with conventional drugs imposes many side effects and decreases  
175 the QOL. The usual therapy offered to such patients is best supportive care. Metronomic  
176 chemotherapy can induce tumor stabilization or tumor responses in patients with cancer that are  
177 refractory or have relapsed after conventional chemotherapy. Whether metronomic therapy is  
178 better than best supportive care is not known. In order to do so, a study is required which may  
179 compare metronomic therapy with a placebo therapy on PFS and QOL in relapsed refractory cases of  
180 paediatric solid tumours who have failed at least two lines of chemotherapy.

181

182 **HYPOTHESIS**

183 The investigators hypothesize that metronomic chemotherapy in progressive paediatric malignancy  
184 will improve PFS and QOL. If validated, then this form for therapy will be an option for both the  
185 patients and the clinicians, who are left with just an option of best supportive care in such situations  
186 of progressive paediatric cancers despite multiple lines of chemotherapy.

187

188 **Condition: Malignant Childhood Neoplasm.**

189 **Intervention: Drug: Low dose chemotherapy.**

190 **Phase: Phase 3**

191 **Study Type: Interventional**

192 **Study Design: Allocation: Randomized**

193 **Endpoint Classification: Safety/Efficacy Study**

194 **Intervention Model: Parallel Assignment**

195 **Masking: Double Blind (Subject, Caregiver)**

196 **Primary Purpose: Treatment**

197

198 **Primary Outcome Measures:** •Progression free survival

199 **Secondary Outcome Measures:** •Overall Survival

200 **Other Outcome Measures:** •Quality of life

201 •Bio marker of angiogenesis (VEGF), Thrombospondin-1

202 **Eligibility:**

203 Ages Eligible for Study: 5 Years to 18 Years

204 Genders Eligible for Study: Both

205 **Inclusion Criteria:**

206 1. Refractory/Progressive non hematopoietic extracranial solid tumours following treatment with at  
207 least 2 lines of chemotherapy.

208 2. ECOG performance status ( $\leq 3$ ) (at least patients ambulating with crutches or on wheel chair)

209 3. Age: 5-18 years

210 4. Recovered from all acute toxic effects of earlier therapy

211 5. Absolute neutrophil count  $> 1 \times 10^9/L$

212 6. Absolute platelet count  $> 75 \times 10^9/L$

213 7. Normal renal functions

214 8. Serum bilirubin  $< 1.5$  times the upper limit of normal, and the serum aspartate aminotransferase  
215 and alanine aminotransferase  $< 5$  times the upper limit of normal.

216 **Exclusion Criteria:**

217 1. Uncontrolled concurrent illness or active infection

218 2. Positive serology for human immunodeficiency.

219 3. Unable to swallow oral medication

220 4. Pregnant and breast-feeding

221

222 **Arms**

223 **2. ARM1: Experimental: Low dose chemotherapy**

224 Alternating cycles of Cycle A and B (Each cycle includes 3 weeks of drug administration) with each  
225 drug rounded off to the nearest tablet/capsule size.

226 **Cycle A**

227 •Daily oral Thalidomide (at 3mg/kg)

228 •Daily oral Celecoxib (100 mg BID for patients < 20 kg, 200 mg BID for patients 20-50 kg, and 400 mg  
229 BID for patients > 50 kg)

230 •Daily oral Etoposide (50 mg/m<sup>2</sup>/d)

231 **Cycle B**

232 •Daily oral Thalidomide (at 3mg/kg)

233 •Daily oral Celecoxib (100 mg BID for patients < 20 kg, 200 mg BID for patients 20-50 kg, and 400 mg  
234 BID for patients > 50 kg)

235 •Daily oral Cyclophosphamide (2.5 mg/kg/d to a maximum of 100 mg/d) every 21 days

236 Drug: Low dose chemotherapy

| Drug Code | Drugs                                                                                                | Cycle A<br>(3 weeks) | Cycle B<br>(3 weeks) |
|-----------|------------------------------------------------------------------------------------------------------|----------------------|----------------------|
| Cap1      | Thalidomide (3mg/kg)                                                                                 | Daily                | Daily                |
| Cap2      | Celecoxib<br>100 mg BD for pts < 20 kg, 200<br>mg BD for pts 20–50 kg, 400 mg<br>BD for pts > 50 kg, | Daily                | Daily                |
| Cap3      | Etoposide (50mg/m <sup>2</sup> )                                                                     | Daily                | ----                 |
| Tab4      | Cyclophosphamide<br>(2.5mg/kg)(max=100mg)                                                            | ----                 | Daily                |

237

238 **Table 1: Drug schedule used in the study.**

239

240

241 **3. ARM2: Placebo Comparator and Best supportive care**

242 **Placebo:** Alternating cycles of Cycle A and B (Each cycle includes 3 weeks of drug administration)

243 •Capsules of same size and colour as used in metronomic therapy

244 **Best supportive care**

245 •Management of pain as per WHO standard for pain management

246 The dose of medications in capsules have to be rounded off to the nearest capsule size. Instead of  
247 rounding off on the daily dose, the total dose over the week would be calculated and rounded off  
248 and divided over 5-6 days in a week. This is being done so as to prevent any extra dosing.

249 If any grade 3-4 toxicity occurs in the first course, then the dose for chemotherapy would be reduced  
250 in the subsequent course by 20%.

251 All toxicities and adverse effects of the drugs would be graded according to NCI common  
252 terminology criteria for Adverse Events version 4.03 (June 2010).

253 **Baseline Assessment**

254

255 1. Basic Blood investigations:

- 256 • Complete Blood Counts.
- 257 • Liver and Kidney Function tests

258 2. Radiological Investigations:

- 259 • Contrast enhanced scan of chest and involved site.

260 3. Assessment of biomarkers of angiogenesis

- 261 • Serum/ plasma sample to measure VEGF, bFGF, endostatin, and thrombospondin-1 levels.

262 4. Assessment of QOL by PedsQL- Cancer Module (version 3)

263

264 **Before Each Cycle**

265 1. Basic Blood investigations:

- 266 • Complete Blood Counts.
- 267 • Liver and Kidney Function tests

268 **Interim (Post 3 cycles: at 9 weeks) and (Post 6 cycles: at 18 weeks)**

269

270 1. Basic Blood investigations:

- 271 • Complete Blood Counts.
- 272 • Liver and Kidney Function tests

273 2. Radiological Investigations:

- 274 • Contrast enhanced scan of chest and involved site.

275 3. Assessment of biomarkers of angiogenesis

- 276 • Serum/ plasma sample to measure VEGF, thrombospondin-1 levels.

277 4. Assessment of QOL by PedsQL- Cancer Module (version 3)

278

279

280

281

282

283

284 Further Assessments: Every 3 monthly till Progression

285 1. Basic Blood investigations:

- 286 • Complete Blood Counts.
- 287 • Liver and Kidney Function tests

288 2. Radiological Investigations:

- 289 • Contrast enhanced scan of chest and involved site.

290 3. Assessment of QOL by PedsQL- Cancer Module (version 3)

### 291 **Assessment at Time of Progression**

292 Assessment of biomarkers of angiogenesis

- 293 • Serum/ plasma sample to measure VEGF and thrombospondin-1 levels.

294

295

### 296 **Statistical analysis:**

297 Descriptive statistics such as mean, median, standard deviation and range will be used to describe  
298 baseline demographic and clinical profile of all patients. To see association between two categorical  
299 variables, Chi-square test will be used. To see association between two continuous variables, t-test  
300 or Wilcoxon rank sum test will be used. Survivals will be depicted using Kaplan Meier plots.  
301 Difference between groups will be analysed using log-rank test. Proportional survival at specific  
302 times will be determined using Kaplan Meier survival analysis. P-value <0.05 will be considered as  
303 significant. Data analyses will be performed using statistical software packages Stata 11.2.

### 304 **Sample Size Calculation:**

305 From an exhaustive review of literature, data on PFS in solid extracranial tumours paediatric  
306 tumours after failing two lines of treatment, without any further therapy is not available from  
307 anywhere. From our experience we know that most of such advanced patients will progress within  
308 few weeks to months time. Therefore, we make the modest assumption that 95% of such patients  
309 will progress by 6 months without therapy and a 20% improvement is a standard parameter for  
310 efficacy in oncology patients. With a 2 sided  $\alpha$  of 5% and power of 80%, a sample size of 49 in each  
311 group would detect a 20% difference between the proportion of progression at 6 months between  
312 placebo arm (group 1) and metronomic (group 2) (95% vs 75%). Assuming loss to follow up of 15%,  
313 54 subjects per group will be required. So, total of 108 patients are proposed to be randomized.

314

### 315 **Ethics and Registration:**

316 The study protocol was submitted to the Institute Ethics Committee and approval has been  
317 obtained. All patients were included in the study after informed written consent.

318

319 **Enrollment: 108**

320 **Study Start Date: October 2013**

321 First received: May 17, 2013

322 Last updated: July 12, 2016

323 Last verified: July 2016

324 **Primary Completion date (last date for data collection)**

325

326
